# Supplementary material for: STAG1 vulnerabilities for exploiting cohesin synthetic lethality in STAG2-deficient cancers
Source: Life Sci Alliance. 2020 May 28;3(7):e202000725. doi: 10.26508/lsa.202000725 (PMC7266993; doi:10.26508/lsa.202000725)
Supplement: Supplementary file 8 [file LSA-2020-00725_TableS4.xlsx]

## Sheet: Supplementary Table S5
Supplementary Table S4. Sequences of mir-E shRNAs (provided as full 97mers for shRNA cloning into miR-E vectors).
ID	22mer guide (mature shRNA)	97mer (for shRNA cloning)
MYC.1834	TGTTTCAACTGTTCTCGTCGTT	TGCTGTTGACAGTGAGCGCACGACGAGAACAGTTGAAACATAGTGAAGCCACAGATGTATGTTTCAACTGTTCTCGTCGTTTGCCTACTGCCTCGGA
Ren.660	TTACTAACGGGATTTCACGAGG	TGCTGTTGACAGTGAGCGACTCGTGAAATCCCGTTAGTAATAGTGAAGCCACAGATGTATTACTAACGGGATTTCACGAGGTGCCTACTGCCTCGGA
Ren.713	TAGATAAGCATTATAATTCCTA	TGCTGTTGACAGTGAGCGCAGGAATTATAATGCTTATCTATAGTGAAGCCACAGATGTATAGATAAGCATTATAATTCCTATGCCTACTGCCTCGGA
STAG1.1110	TTTTCTTGCAGCTCTTTGCGTT	TGCTGTTGACAGTGAGCGCACGCAAAGAGCTGCAAGAAAATAGTGAAGCCACAGATGTATTTTCTTGCAGCTCTTTGCGTTTGCCTACTGCCTCGGA
STAG1.2016	TACTTTGACAGTAACATAGGAA	TGCTGTTGACAGTGAGCGCTCCTATGTTACTGTCAAAGTATAGTGAAGCCACAGATGTATACTTTGACAGTAACATAGGAATGCCTACTGCCTCGGA
STAG1.2076	TTCTAAATCAAAATACTGTGGG	TGCTGTTGACAGTGAGCGACCACAGTATTTTGATTTAGAATAGTGAAGCCACAGATGTATTCTAAATCAAAATACTGTGGGTGCCTACTGCCTCGGA
STAG1.2949	TAGTGTTTGAAGATGTCTGCAG	TGCTGTTGACAGTGAGCGATGCAGACATCTTCAAACACTATAGTGAAGCCACAGATGTATAGTGTTTGAAGATGTCTGCAGTGCCTACTGCCTCGGA
