# Supplementary material for: STAG1 vulnerabilities for exploiting cohesin synthetic lethality in STAG2-deficient cancers
Source: Life Sci Alliance. 2020 May 28;3(7):e202000725. doi: 10.26508/lsa.202000725 (PMC7266993; doi:10.26508/lsa.202000725)
Supplement: Supplementary file 9 [file LSA-2020-00725_TableS5.xlsx]

## Sheet: Supplementary Table S3
Supplementary Table S5. Data collection and refinement statistics
	Site I&II	Site I&II + peptide	Site IV	Site IV + peptide
Space group	P 21 21 21	C 2 2 2	P 21 21 2	P 1 21 1
Cell dimensions a,b,c (Å)	65.6, 125.0, 231.9	117.1, 151.6 126.6	154.7, 166.7, 46.9	74.3, 86.3, 118.6
Angles α, β, γ (°)	90, 90, 90	90, 90, 90	90, 90, 90	90, 95.4, 90
Wavelength (Å)	0.9159	0.9159	0.9159	0.968
Resolution (Å)	85.0-2.02	75.8-2.37	113.3-2.31	60.2-3.17
	(2.07-2.-2)	(2.41-2.37)	(2.37-2.31)	(3.39-3.17)
Rmerge	0.08 (0.96)	0.06 (1.32)	0.09 (0.90)	0.07 (0.39)
Rp.i.m.	0.038 (0.583)	0.024 (0.543)	0.037 (0.373)	0.046 (0.26)
I/σI	9.8 (1.1)	14.0 (1.2)	11.2 (1.9)	7.3 (1.81)
CC1/2	0.99 (0.66)	0.99 (0.70)	0.99 (0.63)	0.99 (0.91)
Completeness (%)	99.8 (98.0)	99.7 (97.9)	100 (100)	97.0 (97.8)
Multiplicity	6.0 (4.4)	6.6 (6.9)	6.4 (6.7)	2.8 (2.8)
No. of unique reflections	125560 (9012)	46073 (2213)	54404 (3991)	24764 (4500)
Refinement Statistics
Resolution	85.0-2.02	74.8-2.37	113.3-2.31	60.2-3.17
Rwork/Rfree %)	21.8/24.5	21.4/24.8	22.6/26.4	21.9/27.8
No. of atoms
Protein	10001	5594	6904	6845
Solvent	627	65	184	0
Peptide	-	324	-	444
Average B factors (Å2)
All atoms	47.8	91.2	64.6	121
Protein	47.8	91.5	64.8	121
Solvent	49.6	74	58.2	-
Wilson B	37	66	50	100
RMSD
Bond lengths (Å)	0.001	0.002	0.001	0.002
Bond angles (°)	0.34	0.39	0.38	0.52
Ramachandran plot
Favoured (%)	98.3	97.6	97.4	95.4
Allowed (%)	1.64	2.06	2.6	3.9
PDB	6qb5	6rrc	6r7o	6rrk
